# Supplementary material for: Jian-Pi-Yi-Shen Formula Improves Adenine-Induced Chronic Kidney Disease via Regulating Tryptophan Metabolism and Aryl Hydrocarbon Receptor Signaling
Source: Front Pharmacol. 2022 Jul 5;13:922707. doi: 10.3389/fphar.2022.922707 (PMC9294467; doi:10.3389/fphar.2022.922707)
Supplement: Supplementary file 4 [file Table1.XLSX]

## Sheet: Targeted Analytes
Cpd Name	Abbr.	CAS	Formula	M.W.	HMDB
3-Hydroxyanthranilic acid	3-HAA	548-93-6	C7H7NO3	153.14	HMDB0001476
3-Hydroxykynurenine	3-HK	2147-61-7	C10H12N2O4	224.21	HMDB0000732
5-Hydroxyindoleacetic acid	5-HIAA	54-16-0	C10H9NO3	191.18	HMDB0000763
Serotonin	5-HT	50-67-9	C10H12N2O	176.21	HMDB0000259
5-Hydroxytryptophol	5-HTOL	154-02-9	C10H11NO2	177.12	HMDB0001855
L-5-Hydroxytryptophan	5-HTP	4350-09-8	C11H12N2O3	220.22	HMDB0000472
5-Methoxy-3-indoleacetic acid	5-Me-IAA	3471-31-6	C11H11NO3	205.21	HMDB0004096
Anthranilic acid	AA	118-92-3	C7H7NO2	137.14	HMDB0001123
indole acrylic acid	IA	29953-71-7	C11H9NO2	187.19	HMDB0000734
Indole-3-acetic acid	IAA	87-51-4	C10H9NO2	175.18	HMDB0000197
Indole-3-acetamide	IAM	879-37-8	C10H10N2O	174.2	HMDB0029739
Indole-3-carboxaldehyde	ICA	487-89-8	C9H7NO	145.16	HMDB0029737
indole ethanol/tryptophol	IE	526-55-6	C10H11NO	161.2	HMDB0003447
3-Indoleglyoxylic acid	IGA	1477-49-2	C10H7NO3	189.17	/
Indolelactic acid	ILA	1821-52-9	C11H11NO3	205.21	HMDB0000671
Indican	Indican	487-60-5	C14H17NO6	295.29	HMDB0061755
3-Indolepropionic acid	IPA	830-96-6	C11H11NO2	189.21	HMDB0002302
Indoxylsulfate	IS	2642-37-7	C8H7NO4S	213.21	HMDB0000682
Kynurenine	KYN	343-65-7	C10H12N2O3	208.21	HMDB0000684
Kynurenic acid	KYNA	492-27-3	C10H7NO3	189.17	HMDB0000715
Nicotinic acid	NA	59-67-6	C6H5NO2	123.11	HMDB0001488
N-Acetyl-5-hydroxytryptamine	NAS	1210-83-9	C12H14N2O2	218.25	HMDB0001238
skatole	skatole	83-34-1	C9H9N	131.18	HMDB0000466
L-Tryptophan	Trp	73-22-3	C11H12N2O2	204.22	HMDB0000929
Xanthurenic acid	Xa	59-00-7	C10H7NO4	205.17	HMDB0000881
Indole-3-acetonitrile	IAN	771-51-7	C10H8N2	156.07	HMDB0006524
Indole-3-acetyl-alanine	IAA-Ala	57105-39-2	C13H14N2O3	246.26	/
Indole-3-acetyl-aspartate	IAA-Asp	2456-73-7	C14H14N2O5	290.09	HMDB0038666
